# Supplementary material
Source: Springer Nature journal article supplement (https://www.springermedizin.de/resource/supplementary/12865_2008_242_MOESM6_ESM.pdf/9427582)
Supplement: MOESM6 [file 9427582]

```

|-----FR1-----|----CDR1----|-----FR2-----|----CDR2----|-----FR3-----|----CDR3----|
Lambda variable genes, subgroup 1
IGLV2   QAVLTQPSS.VSGSLGQRVSITCSGS SNNIGSYG... VGWYQQVPGSGLRTIY GSS..... SRPSGVP.DRFSGSK..SGNTATLTISSLQAED EADYFC ATVDYSSSTV
IGLV6   QDVLTPSS.VSGSLGQNVSICTCSGS SSNVGYANY... VSWHQKQGSAPRTLIY GAT..... SRASGVP.DQFSGSK..SGNTATLTISSLQP EDEADYYC SSYDSSSNIG
IGLV8   QAVLTQPSS.VSGSLGQTVTISCTGS SNNIGILG... VSWYQQIPGSAPRTLIY NSN..... KRPSGVP.DRFSGTK..SGNTGLTIIASLQA EDEADYYC ASADLSLTSP
IGLV23  QAVLTQPSS.VSGSLGQRVTISCTGS SNNIGGGNY... VGWYQQIPGSAPKTLIY RST..... SRPSGVP.DRFSGSR..SGNTATLTISSLQA EDEADYYC ATYESSSYHG
IGLV25  QAVLTQPSS.VSGSLGQRVSITCSGS SNNIGRYG... VGWYQQVPGSGLRTIY GSS..... SRPSGVP.DRFSGSK..SGNTATLTISSLQA EDEADYFC VAYDSSSSIV
IGLV27  QAVLTQPSS.VSGSLGQRVSITCSGS SSNVGYGNY... VSWFQEIIPGSAPRTLIY GDT..... SRASGVP.DRFSGSR..SGNTATLTISSLQA EDEADYFC ASYQSGNT
IGLV28  QAVLTQPSS.VSGSLGQRVSITCSGS SSNVGTGNY... VSWFQEIIPGSAPRTLIY GAT..... SRASGVP.DRFSGSR..SGNTATLTISSLQA EDEADYFC ASYQSGNT
IGLV30  QAVLTQPSS.VSGSLGQRVSITCSGS SSNVNGNY... VSWYQLIPGSAPRTLIY GDT..... SRASGVP.DRFSGSR..SGNTATLTISSLQA EDEADYFC ASAEDSSSNA
IGLV33  QAVLTQPSS.VSGSLGQRVSITCSGS SSNVGTGNY... VSWFQEIIPGSAPRTLIY GAT..... SRASGVP.DRFSGSR..SGNTATLTISSLQA EDEADYFC ASYQSGNT
IGLV35  QAVLTQPSS.VSGSLGQRVSITCSGS SNNIGRYG... VGWYQQVPGSGLRTIY GSS..... SRPSGVP.DRFSGSK..SGNTATLTISSLQA EDEADYFC ATGDYSSSTV
IGLV37  QAVLTQPSS.VSGSLGQRVSITCSGS SSNVGYGNY... VSWFQEIIPGSAPRTLIY GDT..... SRASGVP.DRFSGSR..SGNTATLTISSLQA EDEADYFC ASYQSGNT
IGLV39  QAVLTQPSS.VSGSLGQRVSITCSGS SNNIGSYG... VGWYQQVPGSGLRTIY GSS..... SRPSGVP.DRFSGSK..SGNTATLTISSLQA EDEADYFC AAGDSSSSTG
IGLV43  QAVLTQPSS.VSGSLGQRVSITCSGS SSNVGYGNY... VSWFQEIIPGSAPRTLIY GAT..... SRASGVP.DRFSGSR..SGNTATLTISSLQA EDEADYFC ASPDSSSSG
IGLV45  QAVLTQPSS.VSGSLGQRVTISCTGS SNNIGGGNC... VGWYQQIPGSAPKTLIY RST..... SRPSGVP.DRFSGSR..SGNTATLTISSLQA EDEADYYC ATYESSSYHG
IGLV49  QAVLTQPSS.VSGSLGQRVSITCSGS SSNVGLGNY... VSWFQQIPGSAPRTLIY GAT..... SRASGVP.DRFSGSR..SGNTATLTISSLQA EDEADYFC ASPDSSSSS
IGLV55  QAVLTQPSS.VSGSLGQRVSITCSGS SSNVGRGNY... VNWFQQIPGSAPRTLIY GAT..... SRASGVP.DRFSGSR..SGNTATLTISSLQA EDEADYFC AAGDSSSSTG

Lambda variable genes, subgroup 2
IGLV10  QSGLTQPSS.VSGNLGQTVITSCAGT SSVVGSYNG... VGWYQLLPGSAPKTLIY NVS..... KRPSGIP.DRFSGSK..SGNTATLTVSGLQA EDEADYYC SSYKSGGSV
IGLV13  QSGLTQPSS.VSGNLGQTVITSCAGT SSDVGAYNG... VGWYQLLPGSAPKTLIY NLN..... KRSSGIP.ARFSGSK..SGNTATLTISSLQA EDEADYYC SSYKSGGSV

Lambda variable genes, subgroup 6
IGLV14  SSQLTQPPA.VSVSLGQTASITCQGD DLESYY.... AHWYQQKPSQAPVLVIY ESS..... ERPSGIP.DRFSGSS..SGNTATLTIISGAQTE D EADYYC QSYDSSGDP
IGLV15  SYELTQPTS.VSVALGQTAKITCSGD LLDEQY.... TQWYQQKPGQPVVRIY KDS..... ERPSGIS.DRFSGSS..SGKTATLTIISGAQTE D EADYYC QSADSSDNP
IGLV16  SYELTQLTS.VSVALGQTAKITCSGE LLDEQY.... TQWYQQKPGQAPKLVYI KDS..... KRRSGIP.DQFSGSS..SGKTAILTISGVRAE D EADYYC LSWDSSGSYNV
IGLV17  SSQLTQPPA.VSVSLGQTASITCQGD DLELLS.... AHWYQQKPGQAPVLVIY ADD..... NLAGSIP.DRFSGSK..SDTTATLTIIRGAQ E D EADYYC QSADISGV

Lambda variable genes, subgroup 7
IGLV21  QPVLTPVTV.SASLGASARLSCTLS SGINVSNYS... IYWYQQKAGNPLRYLLR FKSDSDK... HQGSGVP.SRFSGSKDASTNAGLLLISGLQPE D EADYYC AVWHGDTNA

Lambda variable genes, subgroup 8
IGLV40  QTVI.QEPS.LSVSPGGTVTLTCLGS SGSVTTYNE... PSWYRETPGQAPRNVYI NTN..... TPRTGVP.DRFASAI..SGNKVTLTITGAQPE D EADYHC LLYQGSDSYG
IGLV46  QTVI.QEPS.LSVSPGGTVTLTCLGS SGSVTTYNE... PSWYRETPGQAPRNVYI NTN..... TPRTGVP.DRFASAI..SGNKVTLTITGAQPE D EADYLC LLYQGSDSYG

Kappa variable genes, subgroup 2
IGKV8   DVVLTQTPLSLSVIPGETVSI SCKST QSLKYSGKTY.. LRWLQHKPGQSPQSLIY QVS..... NRYTGVP.DRFTGSG..SETDFTLTISSVQA E D AGVYVC VQETHDPR
IGKV10  DVVLTQTPLSLSVIPGETVSI SCKST QSLKYSDGKTY.. LRWVQHKPGQSPQGVYI QVS..... NRNTGVP.DRFTGSG..SETDFTLTISSVQA E D AGVYVC FQGTYEPP
IGKV11  DVVLTQTPLSLSVIPGETVSI SCKST QSLKYSGKTY.. LRWLQHKPGQSPQSLIY QVS..... NRYTGVP.DRFTGSG..SETDFTLTISSVQA E D AGVYVC VQETHDPR
IGKV13  DVVLTQTPLSLSVIPGETVSI SCKST QSLKYSDGKTY.. LRWVQHKPGQSPQGVYI QVS..... NRNTGVP.DRFTGSG..SETDFTLTISSVQA E D AGVYVC FQGTYEPP
IGKV14  DVVLTQTPLSLSVIPGETVSI SCKST QSLKYSGKTY.. LRWLQHKPGQSPQSLIY QVS..... NRYTGVP.DRFTGSG..SETDFTLTISSVQA E D AGVYVC VQETHDPR
IGKV19  DVVLTQTPLSLSVIPGETVSI SCKST QSLKYSDGKTY.. LQWFQHKPGQSPRLLIY QIS..... NRYTGVP.DRFTGSG..SETDFTLTISSVQA E D AGVYVC LQRSYAPR
IGKV21  DVVLTQTPLSLSIIPGEMASIS CKSS QSLVHSDGKTY.. LNWIQYKPGQSPQGLIY QVS..... NRYSGVS.DRFTGSG..SGTDFTLTISRVA E D AGVYVC YQGTEDPP

Kappa variable genes, subgroup 4
IGKV23  DIQVTQSPSYLSASLGDRVSI TCQAN QSVSHY.... LNWYQQKPGEAPKLLIY YAT..... SRYTRVP.SRFSGSG..SGTDFTLTISSLEAD D AANYVC QDYSTPP

Lambda joining genes
IGLJ2   DLFGGTRVTVL
IGLJ3   AVFGSGTTLTVL

Kappa joining genes
IGKJ1   NTFGQGTKVEIK
IGKJ3   ITFGGGKVEIK

```
